# Supplementary material for: Clinical and neuroradiological spectrum of biallelic variants in NOTCH3
Source: PubMed Central journal article supplement (PMC11400611; doi:10.1016/j.ebiom.2024.105297), 2024-08-26
Supplement: mmc1.pdf [file mmc1.pdf]

# NOTCH3 exon 33 variants distribution and associated phenotype

Exon 33

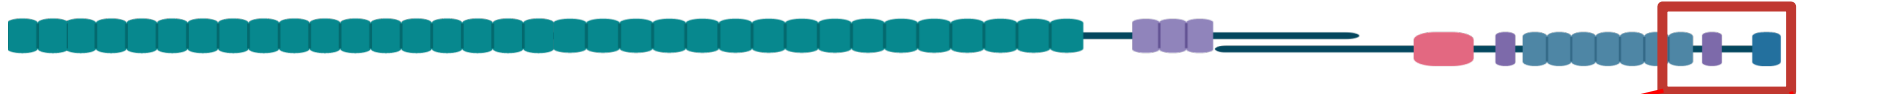

ANK Domain

PEST Domain

c.5962dupC  
p.Leu1976Profs11

LoF PHENOTYPE

c.6247A>T  
p.K2083Ter

c.6409\_6410del  
p.Lys2137Glyfs104

c.6461\_6486del  
p.Gly2154Alafs79

c.6498\_6577del  
p.Ala2167Profs48

c.6603del  
p.Val2202Serfs44

c.6626dup  
p.Pro2210Alafs32

c.6659\_6660del  
p.Glu2220Valfs21

c.6692dup  
p.Pro2231Glnfs10

c.6692\_6693del  
p.Pro2231Glnfs10

c.6663C>G  
p.Tyr2221Ter

c.6732C>A  
p.Tyr2244Ter

LMS PHENOTYPE
